# Supplementary material
Source: PubMed Central journal article supplement (PMC3817540)
Supplement: cr2013107x1.pdf [file cr2013107x1.pdf]

## Supplementary information, Figure S1

**A**

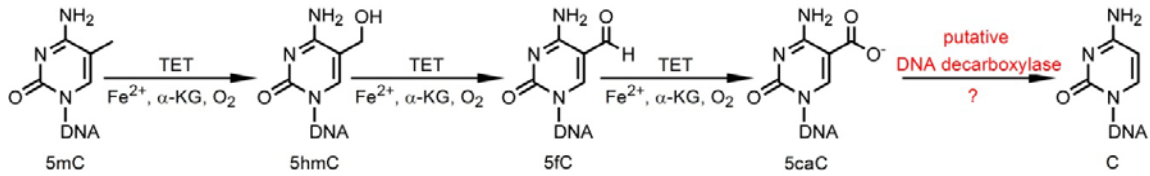

**B**

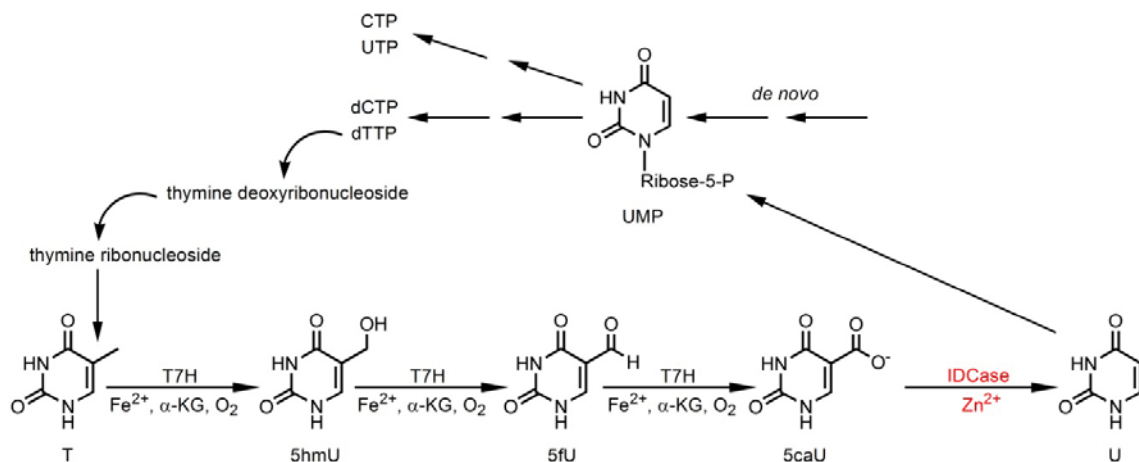

**Figure S1** The chemistry for the conversion of 5mC to C in mammals is very similar to that for the conversion of T to U in the thymidine salvage pathway in fungi. **(A)** The proposed active 5mC demethylation pathway in mammals. The TET proteins are able to sequentially oxidize 5mC to 5hmC, 5fC and 5caC, which requires oxygen,  $\text{Fe}^{2+}$  and  $\alpha\text{-KG}$  as cofactors. 5caC could be decarboxylated to C by a putative DNA decarboxylase. **(B)** The thymidine salvage pathway in some fungi. Thymine-7-hydroxylase (T7H) can sequentially oxidize T to 5hmU, 5fU and 5caU, which also requires oxygen,  $\text{Fe}^{2+}$  and  $\alpha\text{-KG}$  as cofactors. IDCCase can catalyze the decarboxylation of 5caU to U, and requires  $\text{Zn}^{2+}$  as a cofactor.
