# Supplementary material
Source: PubMed Central journal article supplement (PMC3817540)
Supplement: cr2013107x2.pdf [file cr2013107x2.pdf]

## Supplementary information, Figure S2

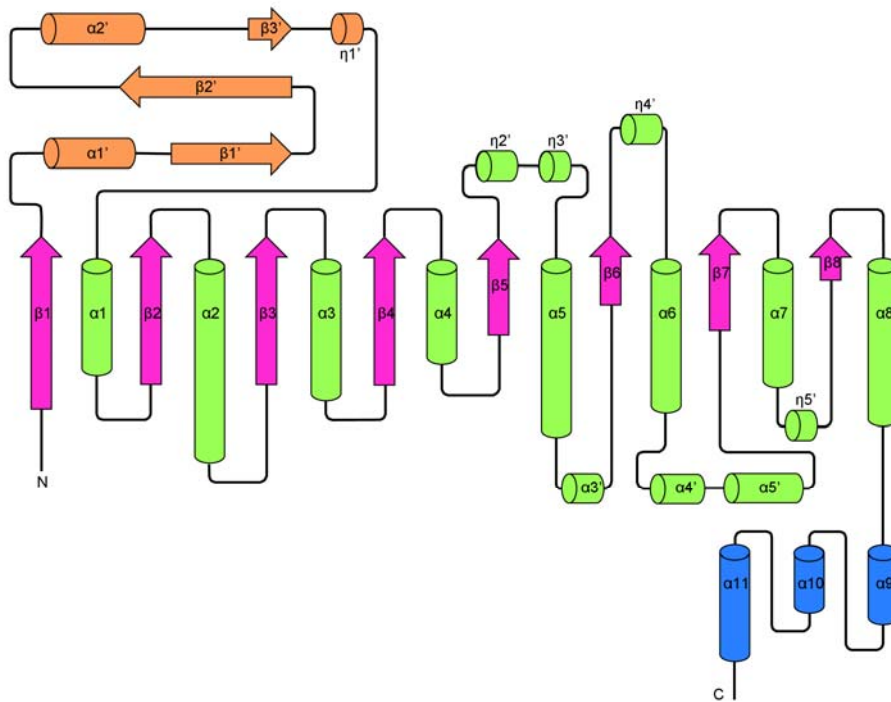

**Figure S2** Topology of the overall structural fold of CmIDCase. The  $(\beta/\alpha)_8$  barrel domain is shown with  $\alpha$ -helices in green and  $\beta$ -strands in magenta. The insertion domain is colored in orange, and the C-terminal three  $\alpha$ -helices in blue.
