# Supplementary material
Source: PubMed Central journal article supplement (PMC3817540)
Supplement: cr2013107x4.pdf [file cr2013107x4.pdf]

# Supplementary information, Figure S4

A

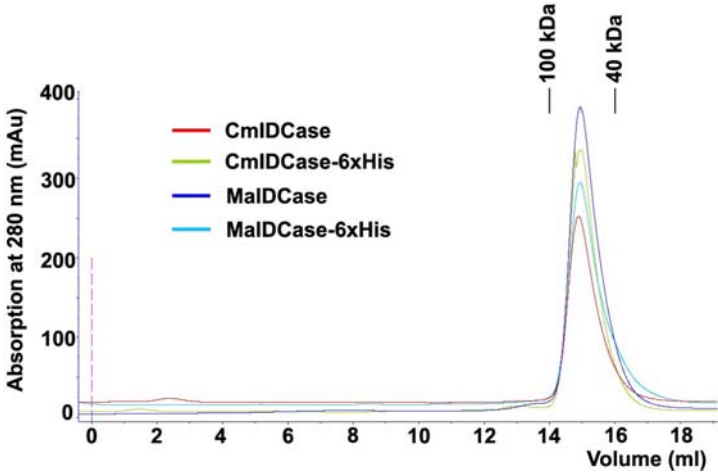

B

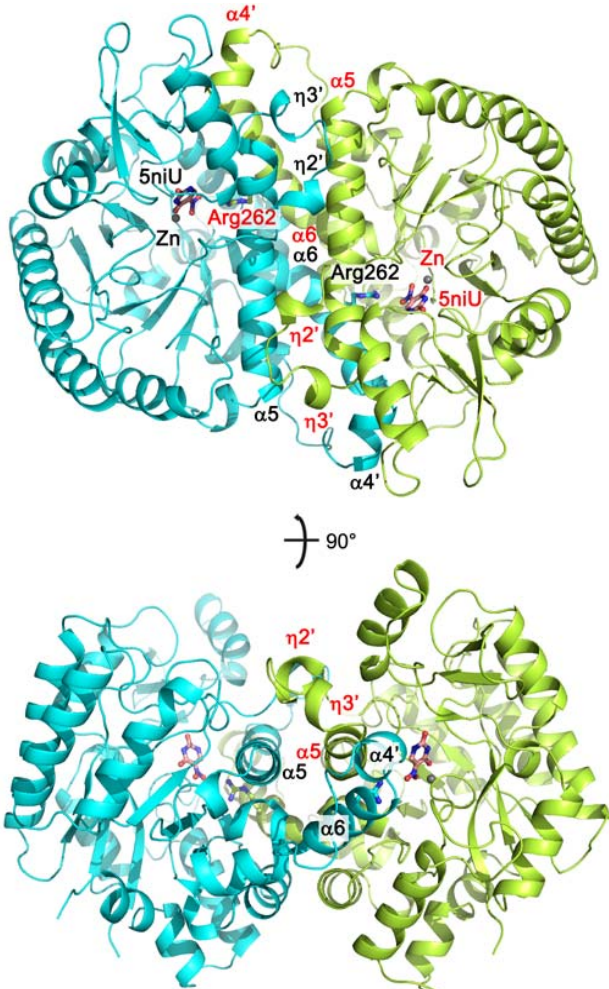

**Figure S4** CmIDCase and MaIDCase exist as dimers in both solution and crystal structure. **(A)**

Size-exclusion chromatography analyses of CmIDCase (red), CmIDCase-6xHis (green), MaIDCase (blue), and MaIDCase-6xHis (cyan). All these proteins exist predominantly as dimers in solution. **(B)**

Two views of the dimeric CmIDCase-5niU complex in ribbon diagram. The bound 5niU and the side chain of Arg262 are shown with ball-and-stick models. Subunit A is colored in green and subunit B in cyan. 5niU, Arg262, and the secondary structure elements involved in the formation of the dimer interface are labeled in red for subunit A and black for subunit B.
