# Supplementary material
Source: PubMed Central journal article supplement (PMC3817540)
Supplement: cr2013107x5.pdf [file cr2013107x5.pdf]

## Supplementary information, Figure S5

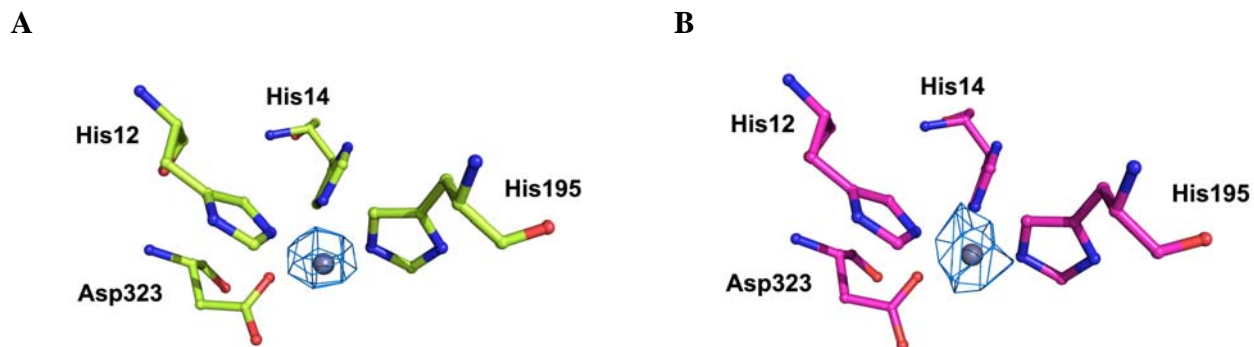

**Figure S5** Anomalous dispersion analyses of CmIDCase and MaIDCase. **(A)** The anomalous difference Fourier map (5.0  $\sigma$  contour level) of the bound Zn<sup>2+</sup> in the apo CmIDCase structure. **(B)** The anomalous difference Fourier map (5.0  $\sigma$  contour level) of the bound Zn<sup>2+</sup> in the apo MaIDCase structure.
