# Supplementary material
Source: PubMed Central journal article supplement (PMC3817540)
Supplement: cr2013107x6.pdf [file cr2013107x6.pdf]

# Supplementary information, Figure S6

A

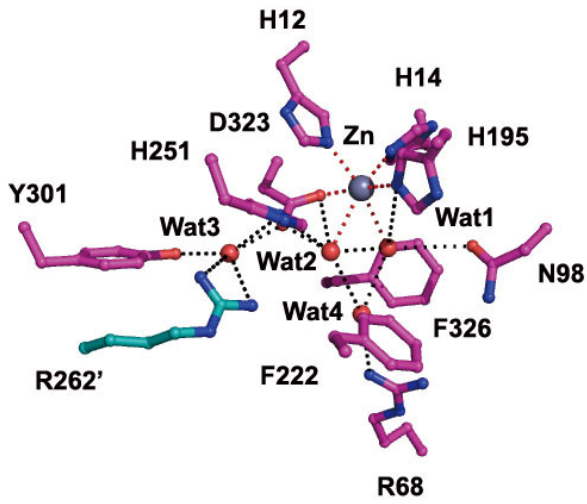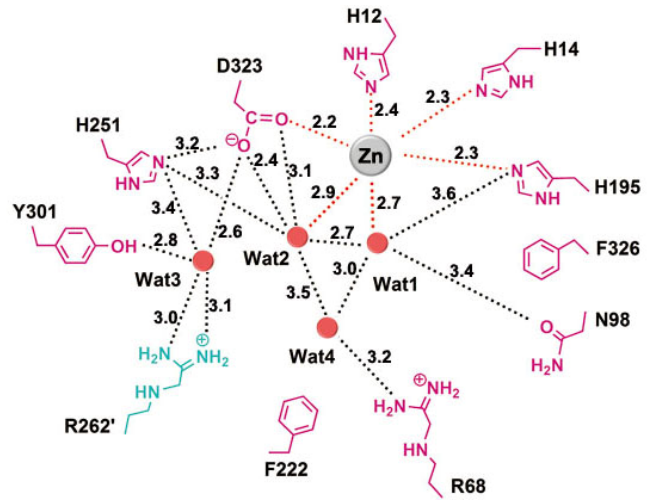

B

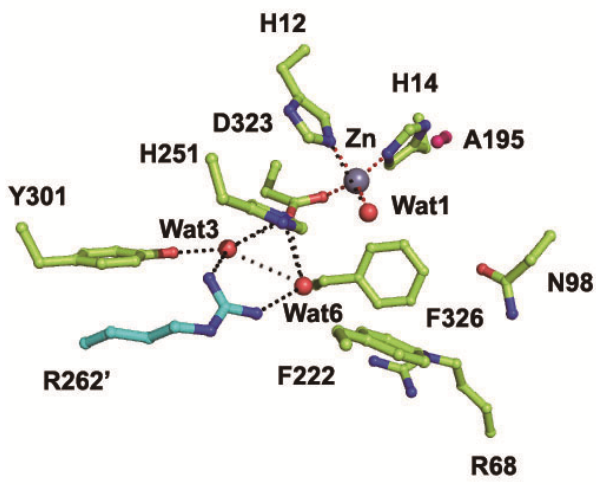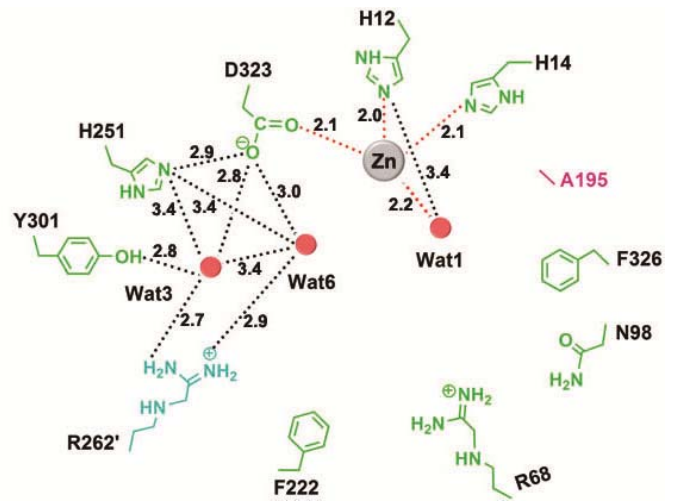

C

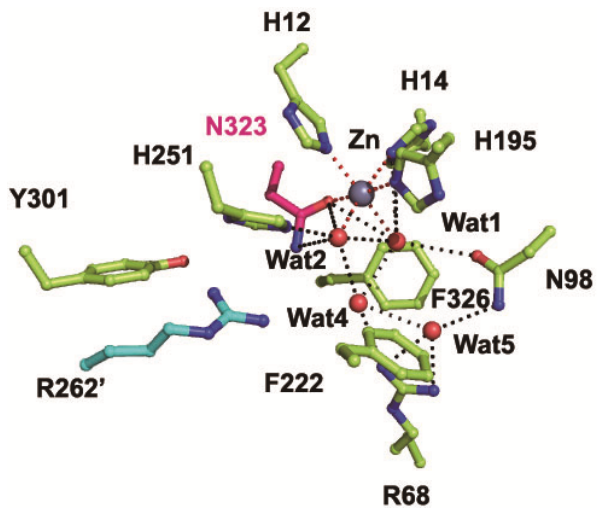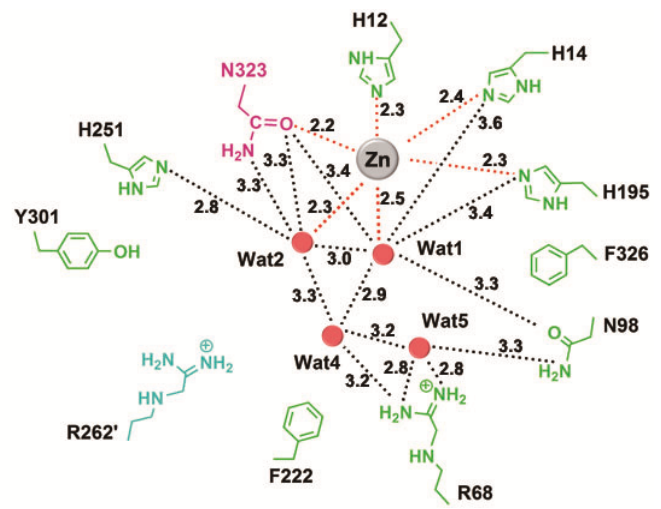

D

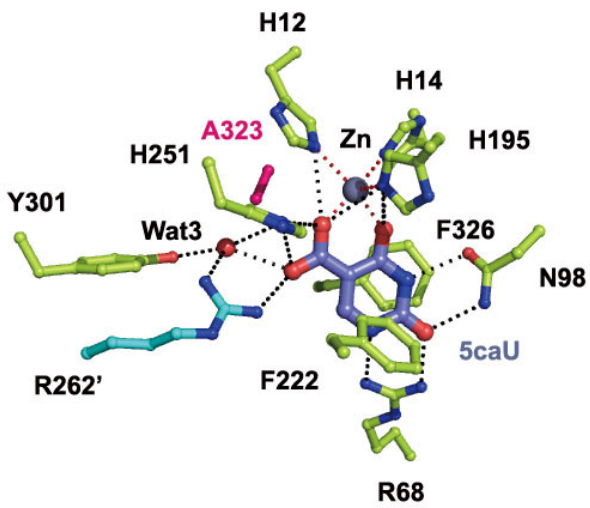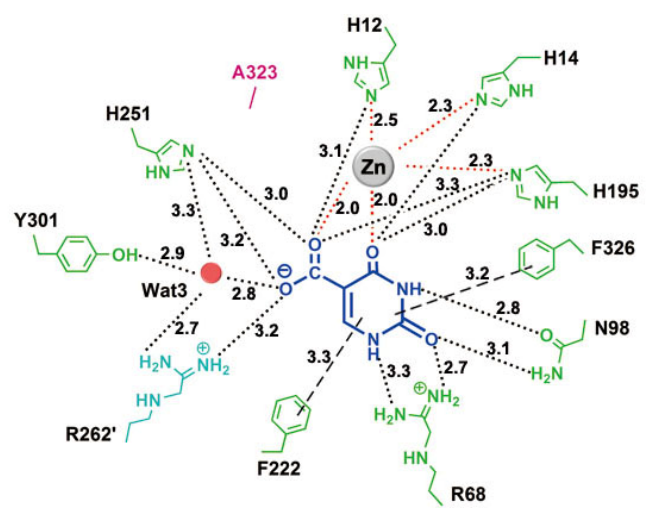

E

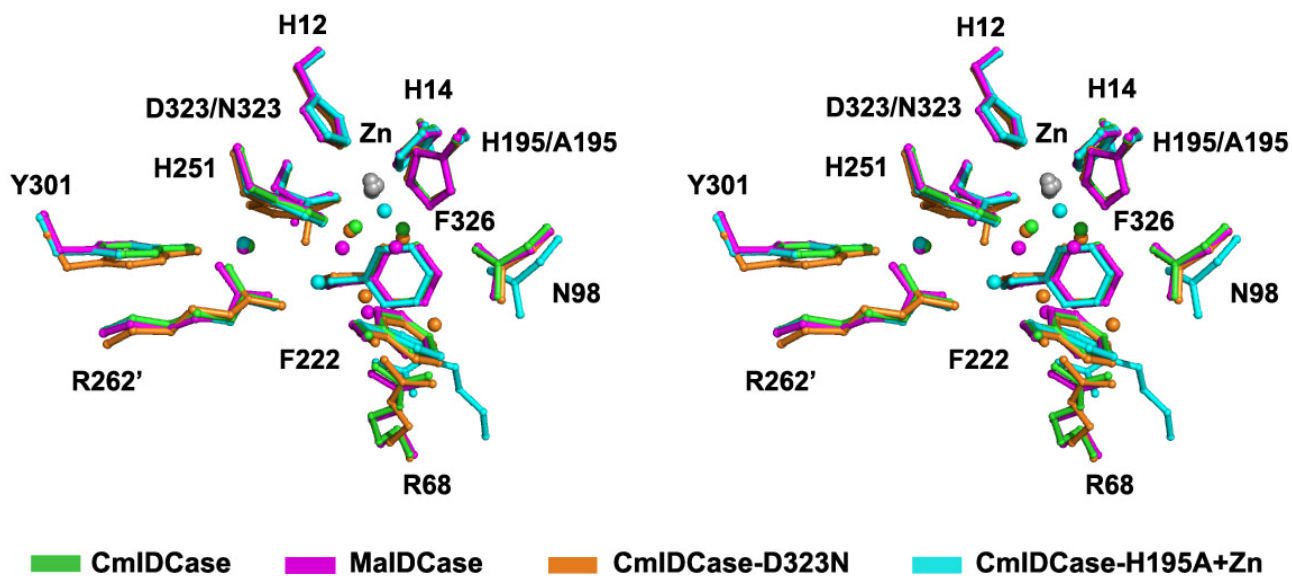

F

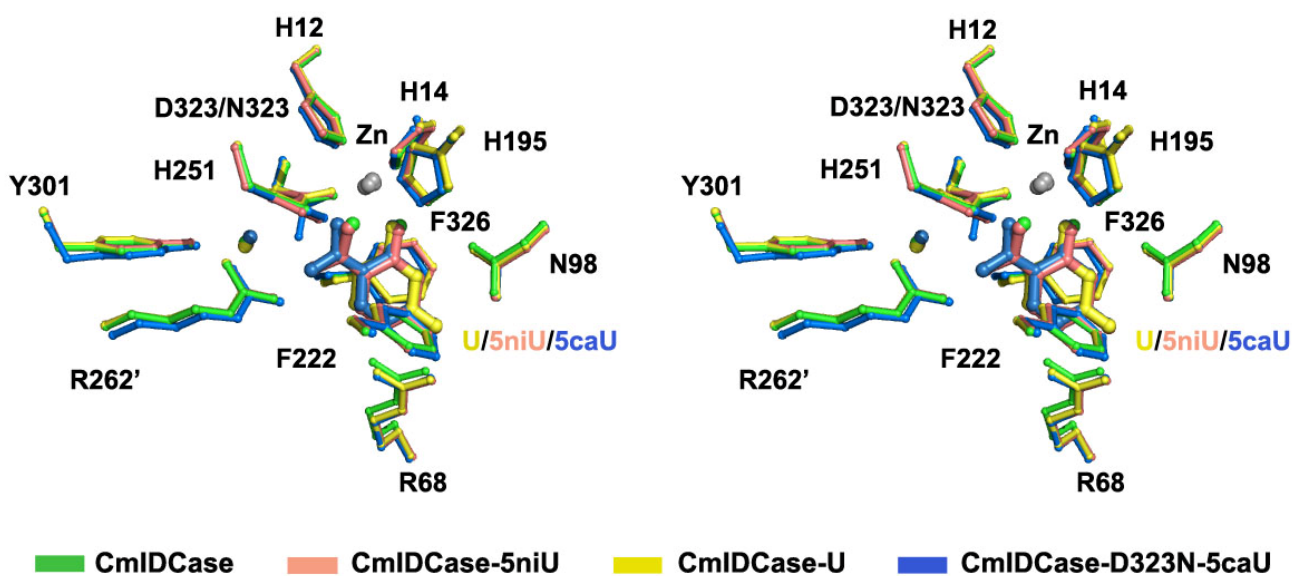

**Figure S6** Structure of the active site. Structure of the active site (left panel) and a schematic diagram showing the interactions of the  $Zn^{2+}$  and/or the ligand with the surrounding residues (right panel) in (A) the apo MaIDCase, (B) the apo H195A mutant (cocrystallized with  $Zn^{2+}$ ), (C) the apo D323N mutant, and (D) the D323A-5caU complex. The ligands and the key residues involved in the interactions with

the  $\text{Zn}^{2+}$  and the ligand are shown with ball-and-stick models, the  $\text{Zn}^{2+}$  with a gray sphere, and the water molecules with red spheres. Arg262 is contributed from an adjacent subunit. The coordination bonds of the  $\text{Zn}^{2+}$  are indicated with red dotted lines, the hydrogen bonds with black dotted lines, and the key hydrophobic interactions with black dashed lines. All bond lengths ( $\text{\AA}$ ) are indicated. **(E)** Comparison of the active site in the structures of the apo CmIDCase (green), the apo MaIDCase (purple), the apo H195A mutant (cyan), and the apo D323A mutant (orange). **(F)** Comparison of the active site in the structures of the apo CmIDCase (green), the CmIDCase-U complex (yellow), the CmIDCase-5niU complex (orange), and the D323N-caU complex (blue).
