# Supplementary material
Source: PubMed Central journal article supplement (PMC3817540)
Supplement: cr2013107x7.pdf [file cr2013107x7.pdf]

## Supplementary information, Figure S7

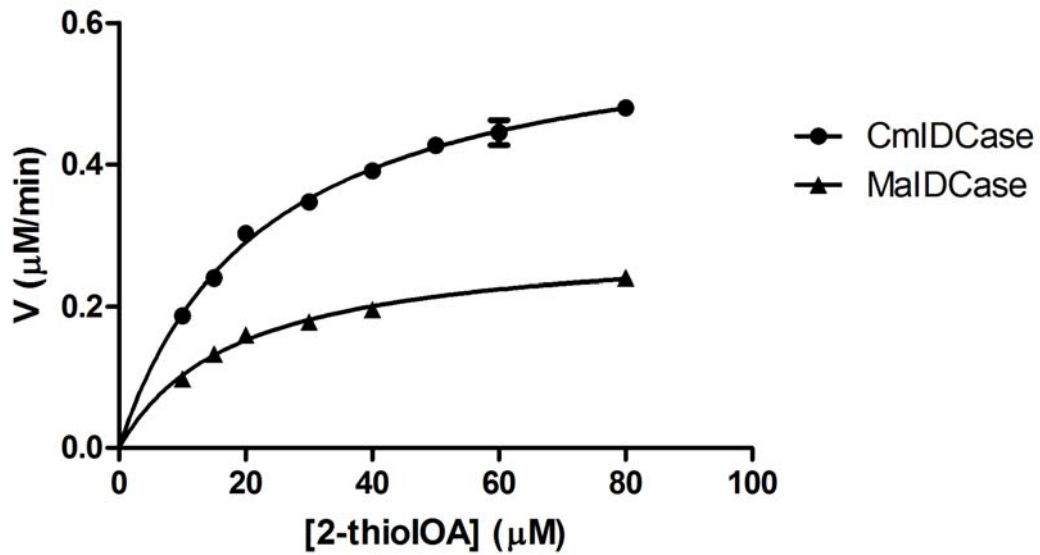

**Figure S7** Kinetic assays of the decarboxylation activities of wild-type CmIDCase and MaIDCase. The enzymatic activities of wild-type CmIDCase and MaIDCase were measured in the presence of different concentration of 2-thioIOA. The kinetic data were fitted to the Michaelis-Menten equation using a nonlinear regression analysis method implemented in GraphPad Prism 5.
